# 1 **KIF21A influences breast cancer metastasis and survival**

2 Anton J. Lucanus<sup>1</sup>, Victoria King<sup>2</sup>, George W. Yip<sup>2</sup>

3 <sup>1</sup> School of Anatomy, Human Biology and Physiology, the University of Western Australia,  
4 Crawley, WA, Australia

5 <sup>2</sup> Department of Anatomy, Yong Loo Lin School of Medicine, National University of  
6 Singapore, Singapore

7 Corresponding Author: George W. Cheong Yip<sup>2</sup>

8 Email address: [george\\_yip@nuhs.edu.sg](mailto:george_yip@nuhs.edu.sg)

9

## 10 **ABSTRACT**

11 Breast cancer pathogenesis is known to be propagated by the differential expression of a  
12 group of proteins called the Kinesin Superfamily (KIFs), which are instrumental in the  
13 intracellular transport of chromosomes along microtubules during mitosis. During mitosis,  
14 KIFs are strictly regulated through temporal synthesis so that they are only present when  
15 needed. However, their misregulation may contribute to uncontrolled cell growth due to  
16 premature sister chromatid separation, highlighting their involvement in tumorigenesis. One  
17 particular KIF, KIF21A, was recently found to promote the survival of human breast cancer  
18 cells *in vitro*. However, how KIF21A influences other cancerous phenotypes is currently  
19 unknown. This study therefore aimed to consolidate the *in vitro* role of KIF21A in breast  
20 cancer metastasis, while also analysing KIF21A expression in human breast cancer tissue to  
21 determine its prognostic value. This was achieved by silencing KIF21A in MCF-7 and MDA-

22 MB-231 breast cancer cell lines via siRNA transfection. Migration, invasion, proliferation,  
23 and adhesion assays were then performed to measure the effects of KIF21A silencing on  
24 oncogenic behaviour. Immunohistochemistry was also conducted in 263 breast cancer tissue  
25 samples to compare KIF21A expression levels against various prognostic outcomes and  
26 clinicopathological parameters. KIF21A knockdown reduced cell migration (by 42.8%  
27 [MCF-7] and 69.7% [MDA-MB-231]) and invasion (by 72.5% [MCF-7] and 42.5% [MDA-  
28 MB-231]) in both cell lines, but had no effect on adhesion or proliferation, suggesting that  
29 KIF21A plays an important role in the early stages of breast cancer metastasis. Unexpectedly  
30 however, KIF21A was shown to negatively correlate with various pro-malignant  
31 clinicopathological parameters, including tumour size and histological grade, and high  
32 KIF21A expression predicted better breast cancer survival (hazard ratio = 0.45), suggesting  
33 that KIF21A is a tumour suppressor. The conflicting outcomes of *in vitro* and *in vivo* data  
34 may be due to the possible multi-functionality of KIF21A or study limitations, and means no  
35 definitive conclusions can be drawn about the role of KIF21A in breast cancer. This warrants  
36 further investigation, which may prove pivotal to the development of novel chemotherapeutic  
37 strategies to mediate KIF21A's function and enhance prognostic outcomes.

38

## 39 **1. INTRODUCTION**

40 Breast cancer is the most frequently diagnosed cancer among women [1], and its metastasis  
41 often leads to death in patients. Breast cancer pathogenesis is known to be affected by the  
42 differential expression of a group of proteins called the kinesin superfamily (KIF) [2].

43 Kinesins were first isolated from squid tissue and identified as molecular motors for axonal  
44 transport that are ubiquitous in all eukaryotes [3]. In total, 45 kinesins have been identified in  
45 humans and other mammals [4,5]. They are sorted into 14 subfamilies based on structural

46 differences, however all share a highly-conserved motor domain that provides motor binding  
47 to microtubules [6]. They have adenosine triphosphate (ATP) activity and microtubule-  
48 dependent motion potential, allowing movement along microtubules through coupling energy  
49 from ATP hydrolysis to force production [6].

50 The role of kinesins has since been specified in the transport of vesicles and organelles within  
51 cells, and chromosomes during mitosis and meiosis. During mitosis, kinesins are strictly  
52 regulated through temporal synthesis so that they are only present when needed [7].  
53 However, misregulation of kinesins during the cell cycle may contribute to uncontrolled cell  
54 growth, highlighting their involvement in tumorigenesis. For example, *either* the depletion or  
55 overexpression of some mitotic kinesins can lead to unbalanced movement of chromosomes  
56 along microtubules during mitosis [8]. This causes a cascade of excessive spindle separation,  
57 premature sister chromatid separation, overshooting before anaphase, and finally unequal  
58 distribution of DNA and aneuploidy [9-11]. The aneuploid daughter cells may display  
59 cancerous behaviour, including increased metastatic behaviour [12].

60 Furthermore, Some KIFs have recently been associated with poor prognosis [13-18] and  
61 chemotherapeutic drug resistance [19-21] in breast cancer patients and cell lines, respectively.  
62 Such an involvement in mitotic deregulation, clinical outcomes and chemotherapeutic  
63 resistance in breast cancer highlights the importance of understanding the molecular  
64 mechanisms underlying the behaviour of KIFs.

65 One particular KIF, KIF21A, was recently found to promote lysosomal stability and the  
66 survival of human breast cancer cells *in vitro* [22]. However, how KIF21A distinctly affects  
67 other malignant phenotypes and prognostic outcomes in breast cancer is currently unknown.  
68 This study therefore aimed to (1) identify whether KIF21A is overexpressed in breast cancer  
69 tissue; (2) understand the functional behaviour of KIF21A in breast cancer cell lines and (3)

70 evaluate the associations between KIF21A expression levels and breast cancer recurrence,  
71 survival and various clinicopathological parameters. KIF21A functional behaviour was  
72 assessed via migration, invasion, proliferation, and adhesion assays in KIF21A-silenced  
73 versus wildtype breast cancer cell lines. Immunohistochemistry staining of KIF21A in  
74 clinical IDC breast tissue microarrays was then performed to determine KIF21A expression  
75 in breast cancer tissue and to examine relationships between KIF21A expression,  
76 clinicopathological data and prognostic outcomes. We hypothesised that KIF21A shows  
77 upregulated expression in breast cancer tissue and correlates with poor prognostic outcomes,  
78 and KIF21A enhances pro-cancerous phenotypes *in vitro*, including migration, invasion,  
79 proliferation and adhesion. Identifying exactly how KIF21A is involved in breast  
80 carcinogenesis may prove pivotal to the development of chemotherapeutic targeting to  
81 mediate its function and improve prognostic outcomes.

82

83

## 84 **2. MATERIALS AND METHODS**

### 85 **2.1 Cell Culture**

86 MCF-7 (ATCC: HTB-22, VA, USA) and MDA-MB-231 (ATCC: HTB-2) cell lines were  
87 cultured in Dulbecco's Modified Eagle Medium (DMEM) supplemented with 10% fetal  
88 bovine serum (FBS) (Hyclone, Logan, UT, USA) and Roswell Park Memorial Institute  
89 medium 1640 (RPMI 1640) (Hyclone) supplemented with 10% FBS, respectively. Both cell  
90 lines were incubated at 37 °C in a humidified incubator with 5% CO<sub>2</sub>. All cell culture was  
91 done without antibiotics.

92

### 93 **2.2 Small Interfering RNA (siRNA) Transfection**

94 Conditions used to achieve favourable silencing efficiency in both cell lines were as follows:  
95  $1 \times 10^5$  (MCF-7) or  $2 \times 10^5$  (MDA-MB-231) cells per well were seeded with culture medium  
96 in a 6-well plate and incubated for 24 hours, which enabled the cells to reach at least 30%  
97 confluence. Transfection with Ambion Silencer Select siRNA (Ambion, Foster City, CA,  
98 USA; Table 1) was performed using Oligofectamine (Thermo Fisher Scientific, Wilmington,  
99 DE, USA) in Opti-MEM1 Reduced Serum Medium (Thermo Fisher Scientific). For MCF-7  
100 cells, 10  $\mu\text{L}$  siRNA was mixed with 175  $\mu\text{L}$  Opti-MEM1 in one tube, while 5  $\mu\text{L}$   
101 Oligofectamine was mixed with 10  $\mu\text{L}$  Opti-MEM1 in another tube. For MDA-MB-231 cells,  
102 10  $\mu\text{L}$  siRNA was mixed with 100  $\mu\text{L}$  Opti-MEM1 in one tube, while 10  $\mu\text{L}$  Oligofectamine  
103 was mixed with 100  $\mu\text{L}$  Opti-MEM1 in another tube. The tubes were incubated at room  
104 temperature for five minutes, after which the contents of both were mixed and incubated  
105 again at room temperature for a further 20 minutes. The medium in each well of the 6-well  
106 plate was removed and replaced with 800  $\mu\text{L}$  (MCF-7) or 780  $\mu\text{L}$  (MDA-MB-231) Opti-  
107 MEM1 and 200  $\mu\text{L}$  (MCF-7) or 220  $\mu\text{L}$  (MDA-MB-231) of the previously-incubated siRNA-  
108 Oligofectamine mixture. The plate was then left to incubate for 8 hours at 37 °C in a  
109 humidified incubator with 5% CO<sub>2</sub>. 500  $\mu\text{L}$  culture medium (30% FBS) was then added to  
110 each well. At 24 hours post-transfection, the medium was replaced with fresh medium  
111 (supplemented with 10% FBS). At 48 hours post-transfection, cells were harvested from each  
112 well for use in subsequent experiments. Ambion Silencer Select Scrambled siRNA was used  
113 as the negative control and Ambion Silencer Select GAPDH siRNA was used as the positive  
114 control.

115

### 116 **2.3 RNA Extraction and One-step qRT-PCR**

117 Total RNA was extracted using the Direct-zol RNA MiniPrep Kit (Zymo Research, Irvine,  
118 CA, USA) according to manufacturer's instructions. RNA yield and purity were then

119 quantified using the Nanodrop ND-100 Spectrophotometer (Thermo Fisher Scientific)  
120 according to manufacturer's protocol. Extracted RNA was subjected to one-step qRT-PCR  
121 using the iTaq Universal SYBR Green One-Step Kit (Bio-Rad, Hercules, CA, USA),  
122 following manufacturer's instructions, on the CFX96 Touch Real-Time PCR Detection  
123 System (Bio-Rad). The qRT-PCR primers used for this study (1st BASE, Singapore) are  
124 shown in Table 2. The program settings used for qRT-PCR were: (1) reverse transcription at  
125 50 °C for 10 minutes; (2) activation step at 95 °C for 30 seconds; (3) 45 cycles of  
126 denaturation at 95 °C for 5 seconds and annealing at 60 °C for 30 seconds; and (4) melt curve  
127 analysis.

128

#### 129 **2.4 Western Blotting**

130 Protein was isolated from cells 72 hours post-transfection using M-PER Mammalian Protein  
131 Extraction Reagent (200 µL/well) (Thermo Fisher Scientific) mixed with 10 µg/mL Halt  
132 Protease Inhibitor Cocktail (2 µL/well) and EDTA (2 µL/well) (Thermo Fisher Scientific).  
133 The buffer mixture was added to cells and incubated for 5 minutes on ice. Cells were then  
134 scraped off with a cell scraper (TPP, Trasadingen, Switzerland), aspirated, and centrifuged at  
135 16,000 g for 10 minutes at 4 °C. The resulting supernatant was extracted and stored at -80 °C.  
136 Following extraction, protein samples were quantified using the Bicinchoninic Acid (BCA)  
137 Protein Assay Kit (Thermo Fisher Scientific) according to manufacturer's protocol and  
138 sodium dodecyl sulphate polyacrylamide gel electrophoresis (SDS-PAGE) was performed.  
139 Following the SDS-PAGE run, protein samples were transferred onto a polyvinylidene  
140 fluoride (PVDF) membrane (Millipore, Billerica, MA, USA) via the wet transfer method.  
141 Protein was subsequently transferred at 100 V for 1 hour at 4 °C. The membrane was then  
142 blocked with 5% BSA (Sigma-Aldrich) in 1X Tris-Buffered Saline and 1% Tween 20  
143 (TBST) for 2 hours, and incubated at 4 °C overnight with primary antibodies (Table 4.3) that

144 were diluted in 5% BSA. Primary antibodies were then removed and the membrane was  
145 washed with 1X TBST three times for 10 minutes each time. Secondary antibodies (Table  
146 4.3) were then added and incubated for 1 hour at room temperature. After which, the  
147 membrane was washed with 1X TBST three times for 10 minutes each time.

148

## 149 **2.5 Transwell Migration Assay**

150 Migration assays were performed using Costar 6.5 mm Transwell chambers with 8.0  $\mu\text{m}$  pore  
151 polycarbonate membrane inserts (Corning, Lowell, MA, USA). siRNA transfection was  
152 performed as per section 4.2. 48 hours post-transfection, cells were harvested, resuspended in  
153 fresh medium (10% FBS), and  $5 \times 10^4$  (MCF-7) or  $3 \times 10^4$  (MDA-MB-231) cells were seeded  
154 into the inserts. The medium outside the inserts was 600  $\mu\text{L}$  fresh medium supplemented  
155 with 30% FBS. The plate was then left in an incubator for 24 hours at 37 °C. Cell suspension  
156 was then removed from inside the inserts. Migrated cells on the outer surface of the  
157 membrane of the inserts were subsequently fixed by 100% methanol and stained with 0.5%  
158 (w/v) crystal violet indicator (Sigma-Aldrich). Visualisation of the migrated cells was  
159 performed using a 10X objective lens under a Nikon SMZ1500 stereomicroscope coupled to  
160 a Nikon DXM1200F digital camera (Nikon, Minato, Tokyo, Japan). Five random field  
161 images per insert were captured for quantification.

162

## 163 **2.6 Matrigel Invasion Assay**

164 The invasion assay was performed in a similar manner to the migration assay, although the  
165 chambers used were BD BioCoat Matrigel Invasion Chambers with 8.0  $\mu\text{m}$  pore size inserts  
166 (BD Biosciences, San Jose, CA, USA). siRNA transfection was performed as per section 4.2.  
167 48 hours post-transfection, cells were harvested, resuspended in fresh medium (10% FBS),  
168 and  $1 \times 10^5$  (MCF-7) or  $5 \times 10^4$  (MDA-MB-231) cells were seeded into the inserts. The

169 medium on the outside of the inserts was 600  $\mu$ L fresh culture medium, supplemented with  
170 30% FBS. The plate was left in an incubator for 24 hours at 37 °C. Invaded cells were then  
171 fixed, stained, imaged and quantified in an identical manner to the migration assay.

172

### 173 **2.7 Serum-Starved Proliferation Assay**

174 Proliferation assays were performed using the CellTiter 96 Aqueous One Solution Cell  
175 Proliferation Assay (Promega, Fitchburg, WI, USA). To begin, cells were serum-starved  
176 overnight prior to seeding, i.e. sub-cultured in fresh medium in a 25-cm<sup>2</sup> flask without FBS.  
177 siRNA transfection was performed as per section 4.2. 72 hours post-transfection, culture  
178 medium was removed and replaced with 1.8 mL fresh medium (10% FBS) with 300  $\mu$ L MTS  
179 reagent. Samples were incubated at 37 °C for 1 hour prior to measuring absorbance values  
180 once every hour for 4 hours. Formazan absorbance was detected at 490 nm by a GENios  
181 Plate Reader (Tecan, Austria).

### 182 **2.8 Cell Adhesion Assay**

183 96-well plates were coated overnight with either 50  $\mu$ L collagen I (Corning) or 50  $\mu$ L  
184 fibronectin (BD Biosciences), both at concentrations of 20  $\mu$ g/mL. Collagen I and fibronectin  
185 were then removed and the wells were washed twice with 1X PBS. 100  $\mu$ L 1% BSA (Sigma-  
186 Aldrich) was then added to the same wells for 1 hour at room temperature for blocking. BSA  
187 was then removed and the wells were washed twice with 1X PBS. siRNA transfection was  
188 performed as per section 4.2. 48 hours post-transfection, cells were harvested, resuspended  
189 with fresh medium and seeded into the wells at a density of 1 x 10<sup>4</sup> cells for collagen I and 3  
190 x 10<sup>4</sup> cells for fibronectin wells. The 96-well plate was then incubated for 60 minutes at 37  
191 °C for cells to adhere. Subsequently, non-adhered cells were washed off by 1X PBS. 100  $\mu$ L  
192 complete medium and 20  $\mu$ L MTS were then added to each well. Formazan absorbance was  
193 detected at 490 nm by a GENios Plate Reader (Tecan) once every hour for 4 hours.



194

## 195 **2.9 Immunohistochemistry (IHC)**

196 Archived, formalin-fixed, paraffin-embedded breast cancer tissue samples were received  
197 from the Department of Pathology, Singapore General Hospital (SGH). Only breast invasive  
198 ductal carcinoma (IDC) cases were used for this study. A total of 287 breast IDC cases from  
199 1997 to 2007 were analysed, including 263 tumour tissue samples and 24 adjacent normal  
200 counterparts (all female). For the full distribution of clinicopathological data see Table 4. The  
201 collection of human tissue samples for this study received ethical approval from the  
202 Institutional Review Board, Singapore General Hospital.

203

204 Slides were prepared using tissue microarray (TMA) technology. The TMA slides were  
205 deparaffinised twice in Clearene (Leica Biosystems), rehydrated in a graded series of ethanol,  
206 and finally washed in distilled water. The slides were then washed in 1X Tris-buffered saline  
207 (TBS) (Bio-Rad), incubated with 3% hydrogen peroxide for 30 minutes to block endogenous  
208 peroxidase activity, and washed in 1X TBS with 1% Triton X-100 (TBS-TX) (Bio-Rad)  
209 thrice. Antigen retrieval was performed by boiling the slides at 100 °C for 20 minutes in a  
210 500 mL solution containing 0.1 M sodium citrate, 0.1 M citric acid and distilled water. After  
211 cooling to room temperature, the slides were washed in 1X TBS-TX three times. They were  
212 then blocked for 1 hour using 1:100 dilution goat serum (Dako, Agilent Technologies,  
213 Denmark) at room temperature, followed by KIF21A primary antibody (1:100 dilution; Table  
214 2) incubation overnight at 4 °C. The next day, the slides were washed in 1X TBS-TX, then  
215 incubated with undiluted horseradish peroxidase (HRP) conjugated secondary antibodies  
216 (polyclonal goat anti-rabbit immunoglobulins, Dako, catalogue no. K4010) for 1 hour at  
217 room temperature, and washed again in 1X TBS-TX. To visualise the staining, the slides  
218 were incubated with 3,3'-Diaminobenzidine (DAB) (Thermo Fisher Scientific) for 30

219 minutes, followed by counter-staining in filtered concentrated Shandon Harris haematoxylin  
220 (Thermo Fisher Scientific) for 30 seconds. The slides were finally dehydrated in a graded  
221 series of ethanol and washed twice in Clearene, followed by fixing in Permount (Thermo  
222 Fisher Scientific).

223

224 The fixed TMA slides were scanned and their staining intensities assessed using Philips  
225 Image Management System software (Philips, Amsterdam, Netherlands). KIF21A immuno-  
226 positivity was scored independently by one individual followed by confirmation by a trained  
227 pathologist. The scoring criteria was based on KIF21A staining intensities with '0' = no  
228 staining, '1+' = weak staining intensity, '2+' = moderate staining intensity, and '3+' = strong  
229 staining intensity. Weighted average intensity (WAI) was then calculated, which is the  
230 average intensity of each stained cell

231

## 232 **2.10 Statistical Analysis**

233 For qRT-PCR and all functional assays, Prism 5 (GraphPad Software, La Jolla, CA, USA)  
234 was used to conduct statistical analysis. One-way ANOVAs were utilised to detect significant  
235 differences ( $p < 0.05$ ) between wildtype cells and two groups of KIF21A-silenced cells (each  
236 group used a different siRNA sequence), followed by Tukey's multiple comparisons post-hoc  
237 test. Immunohistochemistry results were analysed using SPSS 18.0 for Windows (SPSS Inc.,  
238 Chicago, IL, USA). KIF21A immunostaining in malignant versus normal tissues were  
239 compared using the non-parametric Mann-Whitney test. Relationships between KIF21A  
240 immunoscores and nominal clinicopathological parameters were analysed using Fisher's  
241 exact test, while relationships with ordinal parameters were analysed using Kendall's tau-c  
242 test. For the survival analyses (recurrence and mortality), the timeline measures (in months)  
243 were: (1) OS (Overall survival) = Date of Death – Date of Diagnosis; (2) SAR (Survival after

244 Recurrence) = Date of Death – Date of Recurrence; (3) DFS (Disease free survival) = Date of  
245 Recurrence – Date of Diagnosis. Survival analyses were performed using Kaplan-Meier  
246 analysis and the log-rank (Mantel-Cox) test, and variables that achieved statistical  
247 significance in univariate analyses ( $p < 0.05$ ) were subsequently entered into a multivariate  
248 analysis using the Cox proportional hazards model via the backward stepwise regression  
249 method (Model A). In addition, to examine the predictive value of KIF21A expression in  
250 greater detail, the analysis included a multivariate Cox proportional hazards model that  
251 included *all* clinicopathological parameters via the enter method (Model B; Table 5.5).  
252 Statistical significance was set at  $p < 0.05$  for all tests.

253

### 254 **3. RESULTS**

#### 255 **3.1 KIF21A Silencing in Breast Cancer Cell Lines**

256 qRT-PCR analysis showed KIF21A was significantly silenced using two different siRNA  
257 sequences, siKIF21A-1 and siKIF21A-2 in MCF-7 cells by 39.8% ( $p < 0.01$ ) and 73.8% ( $p <$   
258 0.001), respectively, and in MDA-MB-231 cells by 67.8% ( $p < 0.001$ ) and 62.7% ( $p < 0.01$ ),  
259 respectively (Figures 1A,B). Western blot analysis showed silencing via siKIF21A-1 and  
260 siKIF21A-2 translated to a reduction in protein levels in MCF-7 cells by 41.8% ( $p < 0.05$ )  
261 and 66.4% ( $p < 0.01$ ), respectively, and in MDA-MB-231 cells by 58.3% ( $p < 0.05$ ) and  
262 69.7% ( $p < 0.01$ ), respectively (Figures 1 C,D).

#### 263 **3.2 Transwell Migration Assay**

264 KIF21A silencing in MCF-7 resulted in a 42.8% ( $p < 0.01$ ) and 39.8% ( $p < 0.01$ ) decrease in  
265 the average number of migrated cells for siKIF21A-1 and siKIF21A-2 groups, respectively,  
266 compared to the negative control (Figures 2A,B). KIF21A silencing in MDA-MB-231  
267 reduced cell migration by 69.7% ( $p < 0.0001$ ) and 64.6% ( $p < 0.001$ ) for siKIF21A-1 and

268 siKIF21A-2, respectively, compared to the negative control (Figures 2C,D).

### 269 **3.3 Matrigel Invasion Assay**

270 KIF21A silencing in MCF-7 resulted in a 42.5% ( $p < 0.001$ ) and 72.5% ( $p < 0.0001$ ) decrease  
271 in the average number of invaded cells for siKIF21A-1 and siKIF21A-2 groups, respectively,  
272 compared to the negative control (Figures 3A,B). KIF21A silencing in MDA-MB-231  
273 reduced cell invasion by 42.5% ( $p < 0.05$ ) and 41.0% ( $p < 0.05$ ) for siKIF21A-1 and  
274 siKIF21A-2, respectively, compared to the negative control (Figures 3C,D).

### 275 **3.4 Cell Proliferation Assay**

276 Analysis of cell proliferation showed no significant differences in cell proliferation between  
277 the negative and KIF21A-silenced groups for both MCF-7 and MDA-MB-231 cells (Figures  
278 4A,B).

279

### 280 **3.5 Cell Adhesion Assay**

281 For MCF-7 cells, analysis showed no significant differences in cell adhesion to both collagen  
282 I and fibronectin between the negative and KIF21A-silenced groups (Figures 4C,D). For  
283 MDA-MB-231 cells, KIF21A silencing also had no significant effect on cell adhesion to  
284 collagen I (Figure 4E). Interestingly, however, silenced MDA-MB-231 cells displayed  
285 reduced adhesion to fibronectin by 47.2% ( $p < 0.05$ ) and 54.0% ( $p < 0.05$ ) for siKIF21A-1  
286 and siKIF21A-2, respectively (Figure 4F).

### 287 **3.6 Comparison of KIF21A Staining Between Normal and Tumorous Breast IDC** 288 **Tissues**

289 KIF21A staining was predominately observed in the nucleus of both normal and tumorous  
290 breast epithelial cells, while cytoplasmic staining was either absent or minimal (Figure

291 5A,B,C). Analysis showed no significant differences in KIF21A nuclear staining between  
292 tumour and normal samples (Figure 5D).

293

### 294 **3.7 Relationship Between KIF21A Expression and Clinicopathological Parameters in** 295 **Breast IDC Tissues**

296 Cut-off values above and below the mean WAI (1.0) were determined as “high” and “low”  
297 KIF21A expression, respectively. High KIF21A expression correlated with tumour size  
298 below 20 mm ( $p < 0.05$ ), and progressively lower histological grades ( $p < 0.01$ ; Table 5). No  
299 significant correlations were observed between KIF21A and other parameters.

### 300 **3.8 Univariate (Kaplan-Meier) analysis of survival and KIF21A expression**

301 The three timelines investigated were overall survival (OS), survival after recurrence (SAR),  
302 and disease-free survival (DFS). Survival data is cause-specific and was available for all  
303 cases, with a follow-up period ranging from 0 months to 156 months. It should be noted that  
304 no patients survived after breast cancer recurrence for the entire follow-up period (Table 6).  
305 Surprisingly, Kaplan-Meier analysis showed patients with high nuclear KIF21A expression  
306 were more likely to have better overall survival ( $p < 0.05$ ; Figure 6A) and survival after  
307 recurrence ( $p < 0.05$ ; Figure 6B). However, nuclear KIF21A expression was not identified as  
308 a significant predictor of breast cancer recurrence, as measured by DFS (Figure 6C).

### 309 **3.9 Multivariate (Cox proportional hazards regression) analysis of survival and KIF21A** 310 **expression**

311 Variables that achieved statistical significance in univariate analyses ( $p < 0.05$ ) were  
312 subsequently entered into a multivariate analysis using Cox proportional hazards model via  
313 the backward stepwise regression method (Model A; Table 7). In addition, to examine the

314 prognostic value of KIF21A in greater detail, the analysis included a multivariate Cox  
315 proportional hazards model that included *all* clinicopathological parameters via the enter  
316 method (Model B; Table 7). This included patients' age, race, tumour size, histological grade,  
317 lymph node involvement, lymphovascular invasion, and ER, PR and HER2 statuses.  
318 However, only those which showed statistical significance ( $p < 0.05$ ) are shown in Table 7.  
319 Model A showed KIF21A acts independently to predict SAR ( $p < 0.05$ ), but significantly  
320 correlates with tumour size in predicting OS ( $p < 0.05$ ). Model B predicted KIF21A as an  
321 independent prognostic factor for both OS ( $p < 0.05$ ) and SAR ( $p < 0.05$ ). However, both  
322 models showed KIF21A expression was not a prognostic factor for recurrence, as measured  
323 by DFS.

324

## 325 **4. DISCUSSION**

### 326 **4.1 KIF21A Mediates Breast Cancer Metastasis *In Vitro***

327 This study identifies KIF21A as a protein whose depletion consistently caused a statistically  
328 and biologically significant reduction in breast cancer cell migration and invasion *in vitro*  
329 (Figures 2 and 3). To our knowledge, this is the first study to identify the role of KIF21A in  
330 cancer cell metastasis – an important finding in the assessment of KIF21A as a potential  
331 therapeutic target. Invasion of malignant cells into the surrounding ECM and migration of  
332 invaded cells towards the bloodstream are pivotal early steps in metastasis, suggesting that  
333 KIF21A is an important mediator of early carcinogenesis. The observed migratory influence  
334 of KIF21A was enhanced in MDA-MB-231 cells, which are known to be highly metastatic,  
335 while higher silencing efficiency using siKIF21A-2 in MCF-7 intensified the reduction in  
336 migration. Furthermore, although a more optimal silencing efficiency would be preferred to  
337 observe the full effects of KIF21A knockdown, there was still a significant reduction in both

338 invasion and migration. Whether complete knockdown would have accentuated this  
339 observation remains unknown. Nonetheless, these cumulative findings suggest that KIF21A  
340 may be a key component of breast cancer cell migratory and invasive pathways. This could  
341 be explained by its interaction with other molecules and their known mechanisms (see  
342 Section 4.3 below).

343 However, these observations surprisingly contradicted the *in vivo* findings of KIF21A  
344 expression in human breast cancer tissue (discussed in-detail in Section 4.2), meaning that  
345 KIF21A's role in cancer metastasis is largely inconclusive. Despite this, *in vitro* functional  
346 assays do serve an important purpose. Although they are only representative of complex *in*  
347 *vivo* conditions, they provide a critical understanding about the influence of genes on distinct  
348 metastatic components. In this case, KIF21A was shown to influence the distinct metastatic  
349 components of migration and invasion – a phenomenon supported by studies of other kinesin  
350 family members. KIF3A and KIF3B, for example, have been shown to interact in a complex  
351 that transports proteins essential for cancer cell migration [23], while KIF11 has been found  
352 to respond to directional cues during chemotaxis to govern the direction of MDA-MB-231  
353 cell migration [24]. Other studies identify KIF14 [25], KIF2A [26], and KIF18A [27] as  
354 mediators of breast cancer migration *in vitro* via a range of pathways. Given the discrepant  
355 results of the current study, migration and invasion assays should be extended to *in vivo*  
356 models to elucidate KIF21A's precise role in these processes.

357 Following migration, cancer cells must adhere to the ECM of a new site where they can then  
358 rapidly proliferate. This study investigated the role of KIF21A in this process. KIF21A  
359 knockdown by 40-70% did not induce any changes in cell proliferation for both breast cancer  
360 cell lines (Figure 4), and thus KIF21A is not implicated as a player in breast cell  
361 proliferation. Although it is difficult to identify studies reporting similarly negative results for

362 other kinesin family members, the present study shows KIF21A varies from previous reports  
363 of KIFs acting as key mediators of proliferation in breast cancer [26,28].

364 KIF21A was also tested for cell adhesion to collagen I and fibronectin fibers – both protein  
365 components of the ECM – yet no changes were observed following silencing in MCF-7 for  
366 both fibers, and in MDA-MB-231 for collagen I fibers (Figure 4). However, reduced  
367 adhesion to fibronectin did occur in MDA-MB-231 cells, suggesting KIF21A could facilitate  
368 breast cancer cell establishment in foreign sites, particularly for highly invasive cells. The  
369 fundamental genetic differences between MCF-7 and MDA-MB-231 cells may have  
370 contributed to differences with their adhesion assays. Further analysis is thus required to  
371 investigate the functional role of KIF21A in breast cancer cell adhesion, which could be done  
372 via overexpression studies and other adhesion assays involving laminin, gelatin and collagen  
373 II fibers. More broadly, there is no particular commonality in the adhesive capabilities of  
374 other kinesins, with many being shown to either positively or negatively regulate adhesion in  
375 various cell lines [25,29,30]. Further studies in KIF21A are therefore encouraged.

#### 376 **4.2 Disparity Between *In Vitro* and *In Vivo* Results**

377 The present study suggested KIF21A exerts oncogenic activity *in vitro*, which resonates with  
378 our hypothesis and previous studies that show KIF21A facilitates the survival of breast  
379 cancer cell lines [22]. However, conflicting results were obtained *in vivo*.  
380 Immunohistochemical analysis suggested KIF21A exerts tumour-suppressive functions,  
381 rather than oncogenic activity. Although it is unclear why different results were obtained for  
382 the same gene, there are several explanations for this phenomenon: (1) ethnic differences.  
383 Various studies illustrate that the mutation status of numerous genes contributing to breast  
384 cancer is different between Asian and Caucasian populations. This study was predominately  
385 performed in Asian individuals, while MCF-7 cells and MDA-MB-231 cells were isolated



386 from Caucasian women. Ethnicity may therefore be a contributing factor to any  
387 discrepancies, and *in vivo* studies of KIF21A in Caucasian populations are encouraged. (2)  
388 One molecule may have dual or multiple physiological functions. For example, both  
389 transforming growth factor beta (TGF-beta) and signal transducer and activator of  
390 transcription 3 (STAT3) have oncogenic or tumour-suppressive roles depending on different  
391 conditions including the mutational background of the tumor [31-33]. Whether KIF21A has a  
392 dual effect remains unknown, however similarly conflicting studies have been observed in  
393 other kinesins, particularly KIF14, which has been shown to both promote and suppress  
394 tumorigenesis [15,34]. (3) Study limitations. *In vitro* assays are useful in studying the  
395 influence of various molecules on distinct metastatic components, but we must not forget the  
396 amazingly complex story of the tumour microenvironment. Firstly, despite strict conditions,  
397 cell line studies cannot control for the vast array of biological parameters that would  
398 otherwise be present *in vivo*. Cell lines studies are therefore better used as tools to delineate  
399 the molecular events underpinning carcinogenesis rather than predicting the entire metastatic  
400 cascade. Secondly, cell lines are only representative of one individual. Although two breast  
401 cancer cell lines were used for support in this study, they cannot match the statistical power  
402 of the 263 breast IDC patient samples analysed via IHC. Of course, some patients may have  
403 indeed had a poorer prognosis with high KIF21A expression, which would resonate with the  
404 *in vitro* findings. However, there was a significant trend towards poorer prognosis correlating  
405 with low KIF21A expression. Further *in vitro* analyses are therefore encouraged in more  
406 breast cancer cell lines that are subject to both KIF21A silencing and overexpression.

407

### 408 **4.3 KIF21A Signaling Pathways Leading to Cell Migration and Invasion**

409 Although few studies have investigated KIF21A beyond its role in congenital fibrosis of the  
410 extraocular muscles type-1 (CFEOM1), evidence suggests it may interact with other genes

411 involved in cell migration. KIF21A binds to brefeldin A (BFA)-inhibited guanine nucleotide-  
412 exchange factor (BIG1) [35] to maintain the organisation of the Golgi apparatus [36], and  
413 also transports KN motif and ankyrin repeat domains 1 (KANK1), influencing its membrane  
414 localisation [37]. Subsequent exploration revealed that both BIG1 and KANK1 co-  
415 immunoprecipitated with KIF21A and each other, such that they may act as a scaffold in  
416 KIF21A-powered intracellular transport [38]. The interaction between all three molecules  
417 was shown to affect cell migration; a phenomenon explained by their combined effects on  
418 cell polarity. Generation and maintenance of cell polarity is essential for directional migration  
419 and results from asymmetric membrane traffic achieved by intracellular transport and the  
420 delivery of extra membrane to the cell's leading edge [39,40]. KIF21A is theorised to act via  
421 BIG1 and KANK1 to position the Golgi and microtubule-organising center (MTOC)  
422 structures anterior to the nucleus, resulting in a polarity shift that induces front-end-directed  
423 cell migration [38]. This interaction would explain the observations seen in breast cancer cell  
424 migration in the present study. In support of this theory, previous studies show polarisation of  
425 Golgi and MTOC structures to be explicitly disturbed by KANK1 or BIG1 siRNA treatment  
426 [38]. However, further investigation is required to identify additional players in  
427 KIF21A/BIG1/KANK1 functional interactions and to elucidate the detailed molecular  
428 mechanisms that alter cell polarity to influence directional migration.

429

#### 430 **4.4 KIF21A in Breast Cancer Tissues**

431 Although our *in vitro* data strongly supported a tumorigenic role for KIF21A in breast cancer,  
432 IHC in breast cancer tissue microarrays was contrary to our hypothesis and showed KIF21A  
433 associated with anti-malignant phenotypes and a better prognosis. Both analyses suggest  
434 KIF21A is involved in breast cancer pathogenesis and prognosis, however their conflicting  
435 outcomes mean the overall results of this study remain largely inconclusive.

436 Nonetheless, numerous important findings came from the IHC analysis. Firstly, there were no  
437 significant differences in KIF21A expression between breast IDC samples and adjacent  
438 normal tissues (Figure 5). This adds to inconsistent evidence regarding the role of KIF21A in  
439 breast oncogenesis, and is contradictory to previous studies in the kinesin superfamily, which  
440 observe upregulation of numerous KIFs in breast cancer [13,15,17]. KIF21A may therefore  
441 not be a useful diagnostic biomarker.

442

443 In addition, KIF21A expression was shown to negatively correlate with the pro-malignant  
444 phenotypes of large tumour size ( $\geq 20$  mm) and high histological grade (Table 5). Large  
445 tumour size and high histological grade classically predict poorer prognosis in breast cancer  
446 [41], so KIF21A may exert a tumour-suppressive role during breast carcinogenesis. However,  
447 the mechanism via which it performs this role was not clear from the IHC analysis, as  
448 KIF21A displayed no relationships with lymphovascular invasion, lymph node involvement,  
449 or various receptors including ER, PR, and HER2. This suggests KIF21A may not regulate  
450 distant metastasis to lymph nodes and blood vessels (in contradiction to the *in vitro*  
451 observations), and it may not be involved in the mechanisms through which oestrogen,  
452 progesterone and human epidermal growth factor increase breast cell proliferation. This  
453 differs from previous observations of concerted KIF21A upregulation upon the introduction  
454 of exogenous oestrogen *in vitro* [42]. One explanation for KIF21A-induced tumour  
455 suppression may therefore be its role in mitosis (see Section 4.5 below).

456

457 Survival analyses were also performed, and revealed high KIF21A expression predicted  
458 better OS and SAR, but had no significant associations with DFS (Figure 6). KIF21A may  
459 therefore act as a tumour suppressor, and may be used as a predictor of breast cancer  
460 survival, but not recurrence. To identify whether KIF21A predicted survival independently of

461 other clinicopathological parameters, multivariate analyses were also performed (Table 7).  
462 Although univariate analysis suggested KIF21A co-predicted OS and SAR with tumour size  
463 and histological grade, Cox proportional hazards models revealed KIF21A acted  
464 independently. KIF21A may therefore be an independent prognostic biomarker for better  
465 breast cancer survival. In this study cohort, lymphovascular invasion, lymph node  
466 involvement, and hormonal and growth factor receptor statuses had no correlations with SAR  
467 and OS – a rare finding (although some of those variables did correlate with recurrence).  
468 Nonetheless, this observation adds to evidence that KIF21A functions independently of  
469 lymphovascular invasive pathways, oestrogen, progesterone, and human epidermal growth  
470 factor to implement its tumour-suppressive activity.

471

472 The possible role of KIF21A as a tumour suppressor and predictor of better breast cancer  
473 prognosis differs from that of most other kinesin family members. KIFs 2A [43], 2C [17], 3C  
474 [44], and 26B [45] have all been identified as predictors of worse breast cancer prognosis.  
475 Intriguingly however, a select few kinesins have been observed as tumour-suppressor genes  
476 consistent with the results of the current study, albeit in other cancer types. Overexpression of  
477 both KIF4 [46] and KIF14 [34] has been shown to reduce metastatic phenotypes *in vitro* and  
478 predict better survival outcomes in human gastric carcinoma and lung adenocarcinoma,  
479 respectively. In both cases, it was theorised that they carried out their tumour-suppressive  
480 functions through their roles in mitosis – a phenomenon that could explain similar  
481 observations in this study (see below).

482

#### 483 **4.5 Mitotic Misregulation as a Functional Explanation for KIF21A-mediated** 484 **Tumorigenesis**

485 Errors at any point during the cell cycle can be catastrophic and in humans can lead to cancer

486 [47]. Chromosome mis-segregation during mitosis, for example, results in abnormal  
487 cytokinesis and aneuploidy [48], which is cleared in normal cells through apoptosis.  
488 However, tumour cells show higher rates of aneuploidy, which is often associated with poor  
489 clinical outcomes [49-51]. Interestingly, misregulation of various mitotic kinesins has been  
490 shown to result in aneuploidy, because unbalanced movement of kinesins can cause excessive  
491 spindle separation, premature sister chromatid detachment, overshooting before anaphase,  
492 and eventually unequal distribution of DNA [8-11]. The aneuploid daughter cells could,  
493 theoretically, display any possible tumorigenic phenotype and a plethora of metastatic  
494 characteristics, including aberrant migration and invasion. Via this mechanism, KIF21A  
495 depletion could result in aneuploidy to facilitate tumour formation, which explains the *in vivo*  
496 findings of this study. High KIF21A expression may therefore suppress carcinogenesis if  
497 KIF21A is implicated in mitosis.

#### 498 **4.6 Future Work**

499 The results of this study were largely inconclusive due to discrepancies between *in vitro* and  
500 clinical data. To further elucidate KIF21A's role in breast cancer, other functional analyses  
501 should therefore be performed (e.g. apoptosis and drug resistance assays) in more breast  
502 cancer cell lines that have been subjected to KIF21A knockdown, overexpression and the  
503 introduction of exogenous KIF21A. This would solidify knowledge about KIF21A's role in  
504 breast cancer *in vitro*, however there still remains little physiological evidence on the role of  
505 KIF21A *in vivo*. IHC analysis of an Asian population in this study should therefore be  
506 extended to Caucasian cohorts. Furthermore, given many known KIF proteins occur in mice  
507 [4], they would be an ideal animal model to knockout genes and explore physiological effects  
508 in tumour xenografts. KIF21A's biological pathways are also poorly understood, and could  
509 be discovered through microarray analysis of KIF21A-silenced cells. Any upstream or

510 downstream targets of KIF21A that are known breast cancer oncogenes would provoke  
511 interesting follow-up studies, and have the potential to be targeted alongside KIF21A in  
512 combinative therapy.

513 Because of the lack of primary data, KIF21A and many other kinesins are yet to be  
514 considered therapeutic targets or prognostic predictors, despite common consensus that  
515 kinesins play a vital role in breast carcinogenesis [8]. If mounting evidence supports either a  
516 tumour-suppressive or oncogenic role for KIF21A in the metastatic cascade, its pathways  
517 could be modulated through targeted chemotherapeutic strategies. Future studies should  
518 therefore attempt to uncover the structure of KIF21A's ATP-, microtubule- and enzyme-  
519 binding sequences, which could lead to the development of KIF21A inhibitors and enhancers.  
520 Identifying binding partners has enormous therapeutic potential, because drugs that mimic  
521 those partners could bind to allosteric pockets to either promote or suppress KIF21A and its  
522 effects on carcinogenesis.

523

#### 524 **4.7 Conclusions**

525 In summary, this study illustrates the potential involvement of KIF21A in breast cancer  
526 pathogenesis and progression. However, the conflicting outcomes of *in vitro* and *in vivo* data  
527 means no definitive conclusions can be drawn about KIF21A's role in breast cancer. This  
528 may be due to ethnic differences, the possible multi-functionality of KIF21A, or even study  
529 limitations, and warrants further investigation into the influence of KIF21A *in vivo*, the  
530 molecules it interacts with, and its potential as a prognostic biomarker. Such knowledge  
531 could lead to the development of novel chemotherapeutic strategies to mediate its function  
532 and enhance prognostic outcomes.

533

## TABLES

| Gene Target           | Target Sequence                     | Concentration Used |
|-----------------------|-------------------------------------|--------------------|
| KIF21A (Homo sapiens) | 5'–<br>CCCUUACAGAAGCCCGAUAtt–3'     | 10nM               |
| KIF21A(Homo sapiens)  | 5'–<br>GUAAGACCCAUGUCAGAUAtt–<br>3' | 10nM               |

**Table 1. siRNAs used and their corresponding target sequences.** Two different KIF21A siRNA sequences were tested to ensure reliability in results.

| Gene           | Forward Primer                        | Reverse Primer                    | Amplicon Size (bp) |
|----------------|---------------------------------------|-----------------------------------|--------------------|
| <i>KIF21A</i>  | 5'–AATGCTGTCAGGATG<br>TGGGA–3'        | 5'–ACTCACAGTCCCAAGA<br>GCTC–3'    | 186                |
| <i>β-ACTIN</i> | 5'–<br>TGGCACCACACCTTCTAC<br>AAT–3'   | 5'–GATAGCACAGCCTGGA<br>TAGCA–3'   | 166                |
| <i>GAPDH</i>   | 5'–<br>GAAGGTGAAGGTCCGAG<br>TCAACG–3' | 5'–TGCCATGGGTGGAATC<br>ATATTGG–3' | 157                |

**Table 2. Primer sequences used during qRT-PCR.**

| Primary antibody | Catalogue number               | Dilution | Secondary antibody                     | Catalogue number           | Dilution |
|------------------|--------------------------------|----------|----------------------------------------|----------------------------|----------|
| KIF21A           | Aviva Systems<br>ARP33932_P050 | 1:1000   | Polyclonal<br>goat anti-<br>rabbit HRP | Dako<br>P0448              | 1:5,000  |
| $\beta$ -actin   | Sigma Aldrich<br>A2228         | 1:10,000 | Anti-mouse<br>IgG HRP                  | GE<br>Healthcare<br>NA9310 | 1:15,000 |

**Table 3. List of primary and secondary antibodies used in Western blotting and their dilutions.** Detection of bound antibodies was performed using either the Pico or Femto Substrate Systems (Thermo Fisher Scientific). The resulting blots were scanned on X-ray films using a GS-800 Calibrated Imaging Densitometer (Bio-Rad). The optical densities of protein bands were analysed with Quantity One Version 4.1.1 software (Bio-Rad).

| Clinicopathological Feature   | Number of Cases (%) | Clinicopathological Feature    | Number of Cases (%) |
|-------------------------------|---------------------|--------------------------------|---------------------|
| <i>Age</i>                    |                     | <i>Race</i>                    |                     |
| ≤ 53 yrs old                  | 149 (56.7)          | Chinese                        | 219 (83.3)          |
| > 53 yrs old                  | 114 (43.3)          | Non-Chinese                    | 44 (16.7)           |
| <i>Tumour size</i>            |                     | <i>Lymphovascular invasion</i> |                     |
| ≤ 20 mm                       | 90 (34.2)           | No                             | 204 (77.6)          |
| > 20 mm                       | 168 (63.9)          | Yes                            | 58 (22.1)           |
| Not available                 | 5 (1.9)             | Not available                  | 1 (0.4)             |
| <i>Lymph node involvement</i> |                     | <i>Histological grade</i>      |                     |
| No                            | 99 (37.6)           | Grade 1                        | 40 (15.2)           |
| Yes                           | 137 (52.1)          | Grade 2                        | 102 (38.8)          |
| Not available                 | 27 (10.3)           | Grade 3                        | 114 (43.3)          |
| <i>ER status</i>              |                     | Not available                  | 7 (2.7)             |
| Negative                      | 87 (33.1)           | <i>PR status</i>               |                     |
| Positive                      | 172 (65.4)          | Negative                       | 126 (47.9)          |
| Not available                 | 4 (1.5)             | Positive                       | 133 (50.6)          |
| <i>HER2 status</i>            |                     | Not available                  | 4 (1.5)             |
| Negative                      | 158 (60.1)          |                                |                     |
| Positive                      | 61 (23.2)           |                                |                     |
| Not available                 | 44 (16.7)           |                                |                     |

**Table 4. Distribution of Clinicopathological Data in Breast IDC Patients.** Abbreviations:



| Clinicopathological Parameter |              | Weighted Average Index (WAI) |           |                    | p-value        |
|-------------------------------|--------------|------------------------------|-----------|--------------------|----------------|
|                               |              | ≤ 1.0                        | > 1.0     | Cases with no data |                |
|                               |              | Number of valid cases (%)    |           |                    |                |
| Age                           | ≤ 53 yrs old | 89 (59.7)                    | 60 (40.3) | 0                  | 0.093          |
|                               | > 53 yrs old | 78 (68.4)                    | 36 (31.6) |                    |                |
| Race                          | Chinese      | 141 (64.4)                   | 78 (35.6) | 0                  | 0.499          |
|                               | Non-Chinese  | 26 (59.1)                    | 18 (40.9) |                    |                |
| Tumour Size                   | ≤ 20 mm      | 49 (54.4)                    | 41 (45.6) | 5                  | <b>0.030*</b>  |
|                               | > 20 mm      | 115 (68.5)                   | 53 (31.5) |                    |                |
| Lymphovascular Invasion       | No           | 128 (62.7)                   | 76 (37.3) | 1                  | 0.759          |
|                               | Yes          | 38 (65.5)                    | 20 (34.5) |                    |                |
| Lymph Node Involvement        | No           | 63 (63.6)                    | 36 (36.4) | 27                 | 0.577          |
|                               | Yes          | 93 (67.9)                    | 44 (32.1) |                    |                |
| Histological Grade            | Grade 1      | 19 (47.5)                    | 21 (52.5) | 7                  | <b>0.002**</b> |
|                               | Grade 2      | 63 (61.8)                    | 39 (38.2) |                    |                |
|                               | Grade 3      | 84 (73.7)                    | 30 (26.3) |                    |                |
| Oestrogen Receptor            | Negative     | 56 (64.4)                    | 31 (35.6) | 4                  | 0.892          |
|                               | Positive     | 108 (62.8)                   | 64 (37.2) |                    |                |
| Progesterone Receptor         | Negative     | 83 (65.9)                    | 43 (34.1) | 4                  | 0.440          |
|                               | Positive     | 81 (60.9)                    | 52 (39.1) |                    |                |
| HER2                          | Negative     | 102 (64.6)                   | 56 (35.4) | 44                 | 0.166          |
|                               | Positive     | 33 (54.1)                    | 28 (45.9) |                    |                |

ER: oestrogen receptor; PR: progesterone receptor; HER2: human epidermal growth factor receptor 2.

**Table 5. Clinicopathological parameters of breast IDC cases correlated against KIF21A expression in epithelial nucleus of tumour cells.** Abbreviations: HER2: human epidermal growth factor receptor 2. \*  $p < 0.05$ , \*\*  $p < 0.01$  (Fisher's exact test for nominal parameters, Kendall's tau-c test for ordinal parameters).

| Timeline                  | KIF21A WAI | Total | No. of events | Censored |         | Log-rank $p$ (Mantel-Cox) |
|---------------------------|------------|-------|---------------|----------|---------|---------------------------|
|                           |            |       |               | No.      | Percent |                           |
| Overall Survival          | ≤ 1.0      | 166   | 43            | 123      | 74.1%   | <b>0.012*</b>             |
|                           | >1.0       | 96    | 12            | 84       | 87.5%   |                           |
|                           | Overall    | 262   | 55            | 207      | 79.0%   |                           |
| Survival After Recurrence | ≤ 1.0      | 67    | 43            | 25       | 37.3%   | <b>0.025*</b>             |
|                           | >1.0       | 31    | 12            | 21       | 67.7%   |                           |
|                           | Overall    | 98    | 55            | 46       | 46.9%   |                           |
| Disease-free Survival     | ≤ 1.0      | 165   | 67            | 98       | 59.4%   | 0.187                     |
|                           | >1.0       | 95    | 31            | 64       | 67.4%   |                           |
|                           | Overall    | 260   | 98            | 162      | 62.3%   |                           |

**Table 6. Data summary of nuclear KIF21A epithelial staining, cause-specific mortality (OS and SAR) and recurrence (DFS) in breast IDC patients over 156-month follow-up period.** An event is defined as either cause-specific death (for OS and SAR timelines) or

| Timeline                  | Parameter              | Reference Group <sup>a</sup> (HR = 1) | Univariate Analysis <sup>c</sup> |              |                | Multivariate Analyses |             |                |                      |             |                |
|---------------------------|------------------------|---------------------------------------|----------------------------------|--------------|----------------|-----------------------|-------------|----------------|----------------------|-------------|----------------|
|                           |                        |                                       | HR                               | 95% CI       | p value        | Model A <sup>d</sup>  |             |                | Model B <sup>e</sup> |             |                |
|                           |                        |                                       |                                  |              |                | HR                    | 95% CI      | p value        | HR                   | 95% CI      | p value        |
| Overall survival          | Tumour Size            | ≤ 20 mm                               | 2.91                             | 1.42 – 5.96  | <b>0.002**</b> | 2.55                  | 1.24 – 5.25 | <b>0.011*</b>  | 2.20                 | 0.88 – 5.50 | 0.090          |
|                           | Histological Grade     | Low <sup>b</sup>                      | 1.67                             | 1.10 – 2.54  | <b>0.012*</b>  | 1.42                  | 0.91 – 2.21 | 0.121          | 0.99                 | 0.57 – 1.72 | 0.968          |
|                           | KIF21A WAI             | Low                                   | 0.45                             | 0.24 – 0.85  | <b>0.012*</b>  | 0.39                  | 0.19 – 0.81 | <b>0.012*</b>  | 0.34                 | 0.14 – 0.82 | <b>0.017*</b>  |
| Survival after recurrence | Tumour Size            | ≤ 20 mm                               | 2.24                             | 1.09 – 4.590 | <b>0.023*</b>  | 2.03                  | 0.99 – 4.19 | 0.055          | 1.30                 | 0.49 – 3.45 | 0.604          |
|                           | KIF21A WAI             | Low                                   | 0.49                             | 0.26 – 0.93  | <b>0.025*</b>  | 0.52                  | 0.27 – 1.01 | <b>0.049*</b>  | 0.37                 | 0.13 – 1.04 | <b>0.048*</b>  |
| Disease-free survival     | Tumour Size            | ≤ 20 mm                               | 1.59                             | 1.01 – 2.50  | <b>0.042*</b>  | 1.21                  | 0.72 – 2.03 | 0.477          | 1.29                 | 0.77 – 2.14 | 0.335          |
|                           | Lymph Node Involvement | No                                    | 1.83                             | 1.16 – 2.88  | <b>0.008**</b> | 1.44                  | 1.18 – 1.75 | <b>0.001**</b> | 1.87                 | 1.17 – 2.98 | <b>0.009**</b> |
|                           | Histological Grade     | Low <sup>b</sup>                      | 1.53                             | 1.13 – 2.07  | <b>0.021*</b>  | 1.22                  | 0.86 – 1.74 | 0.261          | 1.30                 | 0.92 – 1.83 | 0.142          |
|                           | ER                     | Negative                              | 0.50                             | 0.33 – 0.74  | <b>0.001**</b> | 0.47                  | 0.30 – 0.73 | <b>0.001**</b> | 0.56                 | 0.29 – 1.07 | <b>0.001**</b> |
|                           | KIF21A WAI             | Low                                   | 0.75                             | 0.49 – 1.15  | 0.187          | -                     | -           | -              | 0.47                 | 0.30 – 0.73 | 0.080          |

recurrence (DFS timeline), while censored cases represent patients who either did not experience an event during the entire follow-up period, or who withdrew from the study during the follow-up period without experiencing an event. \* *Log-rank*  $p < 0.05$ .

**Table 7. Univariate (Kaplan-Meier) and multivariate (Cox proportional hazards**

**regression) analysis of cause-specific survival in breast IDC patients.** Abbreviations: HR: hazard ratio; CI: confidence interval; ER: oestrogen receptor. <sup>a</sup> Reference groups (HR = 1) were used as the denominator in hazard ratio calculations; <sup>b</sup> Histological grades 1 and 2 were binned into “low” grade, while “high” is classified as grade 3; <sup>c</sup> Kaplan-Meier univariate analysis performed using the log-rank (Mantel-Cox) test; <sup>d</sup> Model A: Cox proportional hazards model including only significant ( $p < 0.05$ ) variables identified from the Kaplan-Meier univariate analysis; <sup>e</sup> Model B: Cox proportional hazards model including all variables.

\*  $p < 0.05$ , \*\*  $p < 0.01$ .

## FIGURE LEGENDS

**Figure 1. KIF21A silencing efficiencies.** A,B) qRT-PCR analysis of KIF21A silencing using two siRNA sequences, siKIF21A-1 and siKIF21A-2, in MCF-7 (A) and MDA-MB-231 (B) cells showed a reduction in KIF21A mRNA expression upon silencing. C,D) Western blot protein band densitometry showed a significant reduction in the optical density of KIF21A protein bands in silenced cells for both cell lines. All protein densities from silenced cells were normalised against  $\beta$ -actin. For all figures: scrambled siRNA was used as the negative control. Values are mean  $\pm$  SEM. n = 3 for each group, \* p < 0.05, \*\* p < 0.01, \*\*\* p < 0.001 (One-way ANOVA with Tukey's multiple comparisons post-hoc test).

**Figure 2. Transwell migration assays of MCF-7 and MDA-MB-231 cells following KIF21A silencing.** (A,C) There was a significant decrease in migrated MCF-7 cells and MDA-MB-231 cells following KIF21A silencing for both silenced groups. (B,D) Representative photomicrographs (10x magnification) of cell migration in MCF-7 cells and MDA-MB-231 cells. For all figures: values are mean  $\pm$  SEM, n = 3 for each group, \*\* p < 0.01, \*\*\* p < 0.001, \*\*\*\* p < 0.0001 (One-way ANOVA with Tukey's multiple comparisons post-hoc test). Scale bars represent 100 $\mu$ m.

**Figure 3. Matrigel invasion assays of MCF-7 and MDA-MB-231 cells following KIF21A silencing.** (A,C) There was a significant decrease in invasive MCF-7 cells and MDA-MB-231 cells following KIF21A silencing for both silenced groups. (B,D) Representative photomicrographs (10x magnification) of cell invasion in MCF-7 cells and MDA-MB-231 cells. For all figures: values are mean  $\pm$  SEM, n = 3 for each group, \* p < 0.05, \*\* p < 0.01, \*\*\* p < 0.001, \*\*\*\* p < 0.0001 (One-way ANOVA with Tukey's multiple comparisons post-hoc test). Scale bars represent 100 $\mu$ m.

**Figure 4. Cell proliferation and adhesion assays in MCF-7 and MDA-MB-231 cells following KIF21A silencing.** (A,B) Serum-starved proliferation assay of MCF-7 and MDA-MB-231 cells following KIF21A silencing. There were no significant differences observed in cell proliferation following KIF21A silencing for both cell lines. (C,D,E,F) Adhesion assays of MCF-7 and MDA-MB-231 cells following KIF21A silencing. For all figures: absorbance (of formazan) was measured at 490 nm and indicates the relative percentage of live cells;

values are mean  $\pm$  SEM; n = 3 (proliferation assays) or 7 (adhesion assays) for each group, \* p < 0.05 (One-way ANOVA with Tukey's multiple comparisons post-hoc test).

**Figure 5.** (A,B,C) Representative photomicrographs of KIF21A immunoreactivity in breast IDC tissue. Staining was predominately localised to the epithelial nucleus of (A) tumour cells and (B) adjacent normal tissue, while cytoplasmic staining was rare. (C) Negative control slide. Scale bars represent 50 $\mu$ m. All photomicrographs are at 40x magnification. (D) There were no significant differences in KIF21A protein expression between breast IDC tumour tissues and adjacent normal tissues, as measured by IHC. Values are mean WAI  $\pm$  SEM. n = 287 (263 tumour, 24 normal) (Mann-Whitney test). Abbreviations: WAI: Weighted Average Intensity.

**Figure 6.** Kaplan-Meier curves for overall cause-specific survival rate (A), cause-specific survival rate after recurrence (B), and disease-free survival (C). KIF21A protein levels in the epithelial nuclei of tumour cells showed prognostic roles in survival (A,B), but not recurrence (C). Patients with low KIF21A expression in breast cancer tissue had significantly shorter survival than those with high KIF21A expression.

## FIGURES

Figure 1.

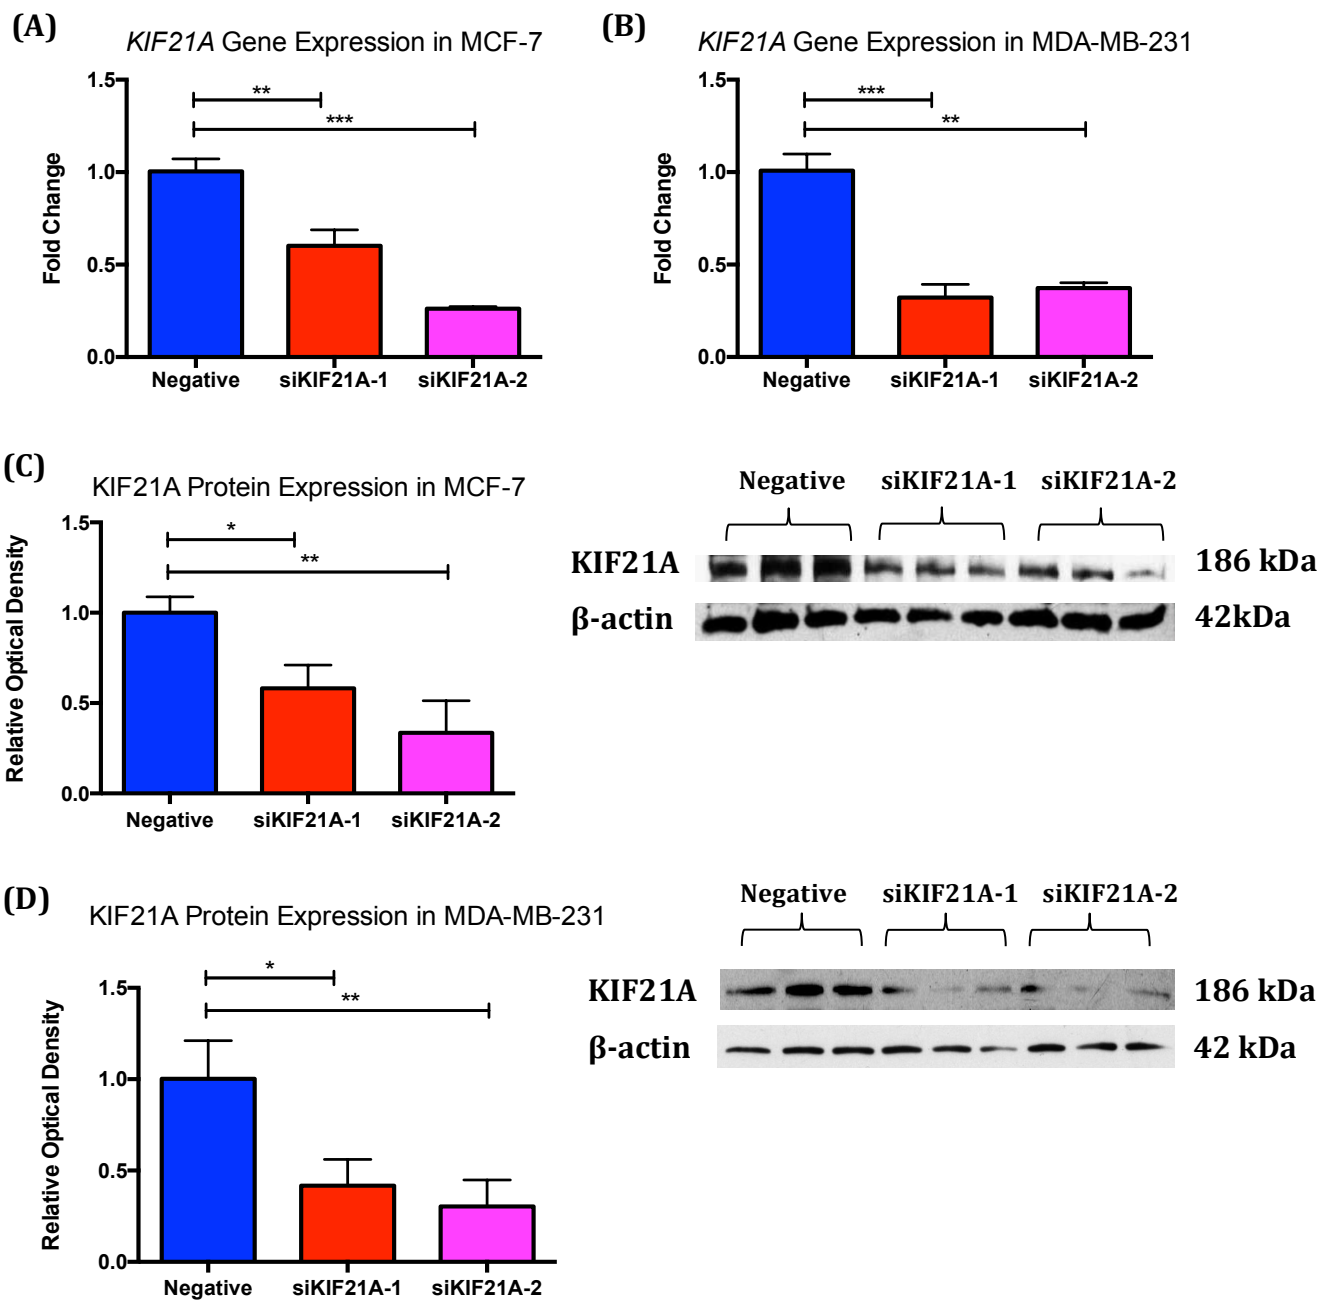

**Figure 2.**

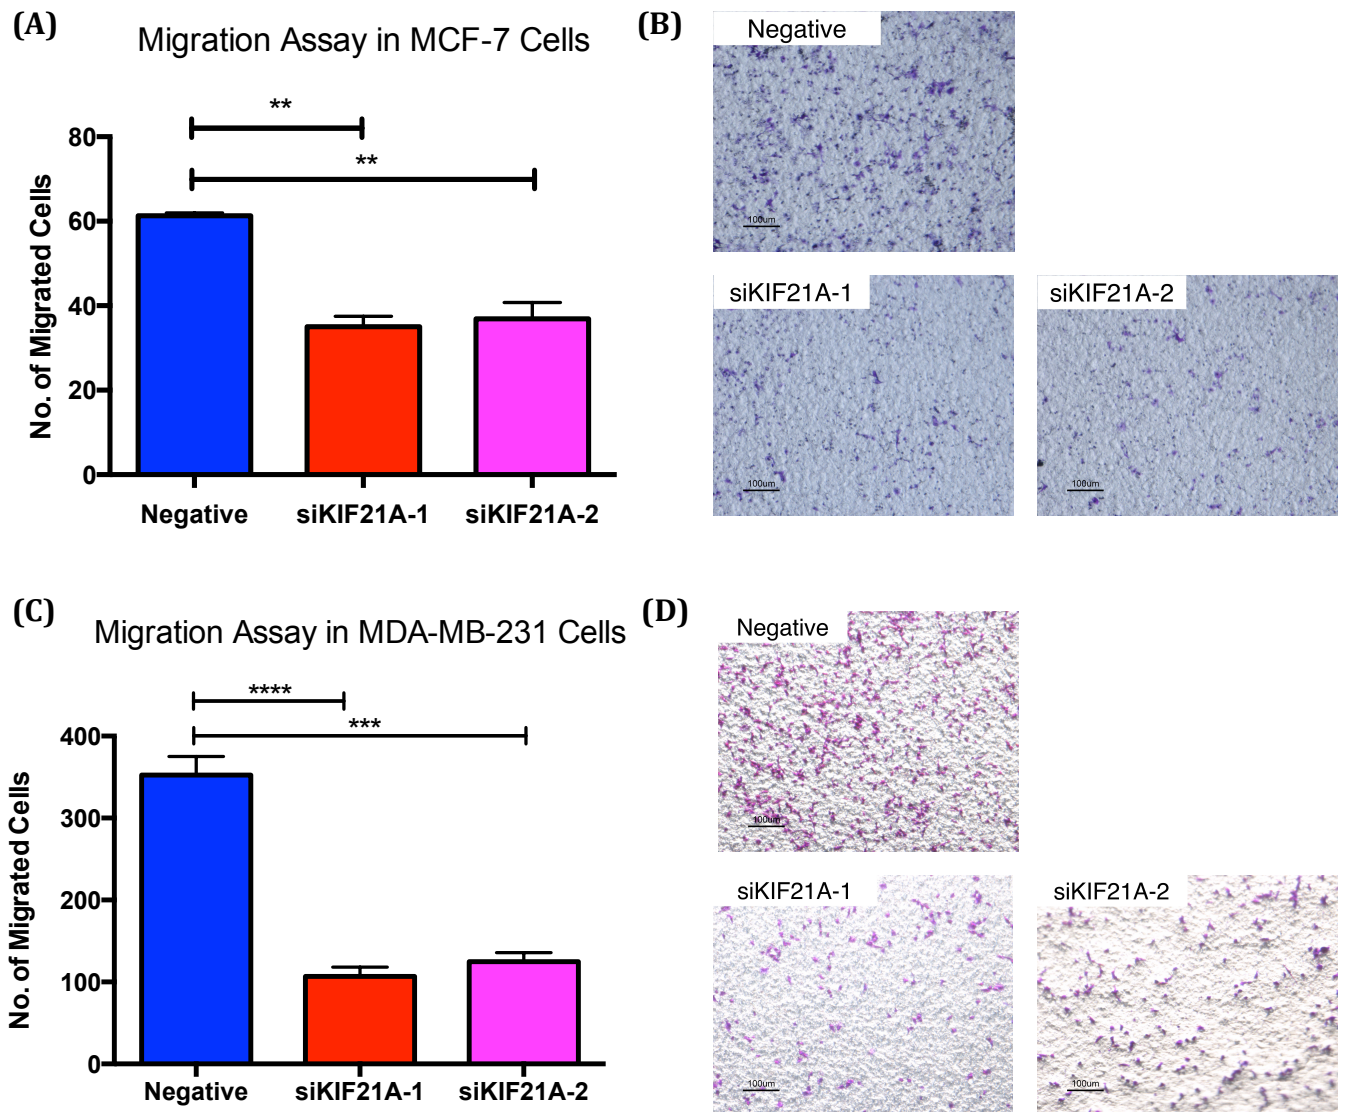

**Figure 3.**

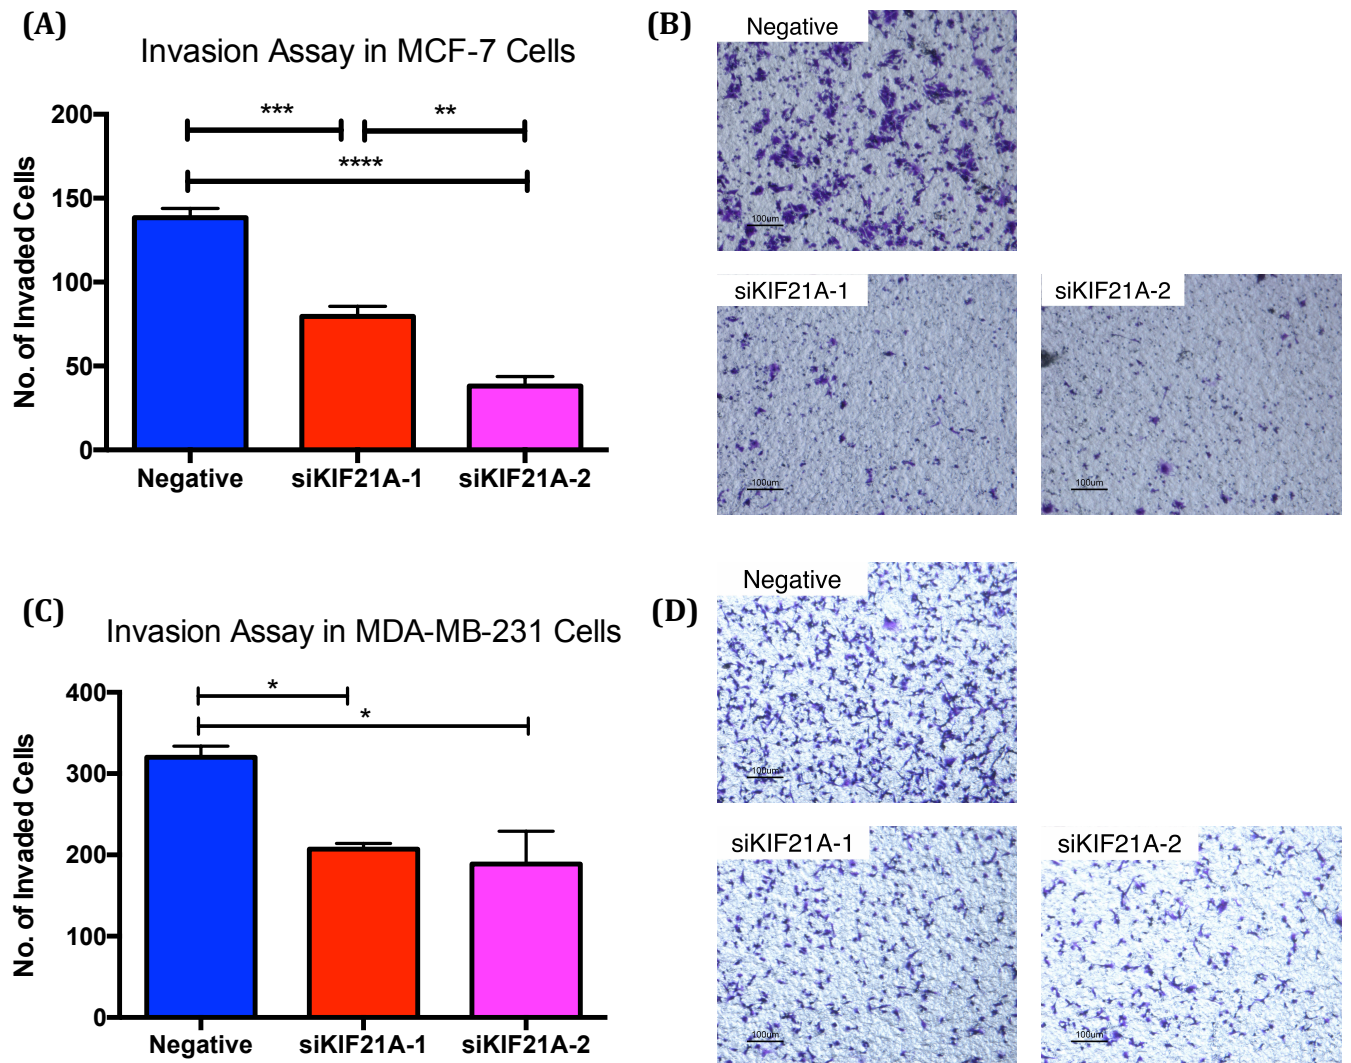

**Figure 4.**

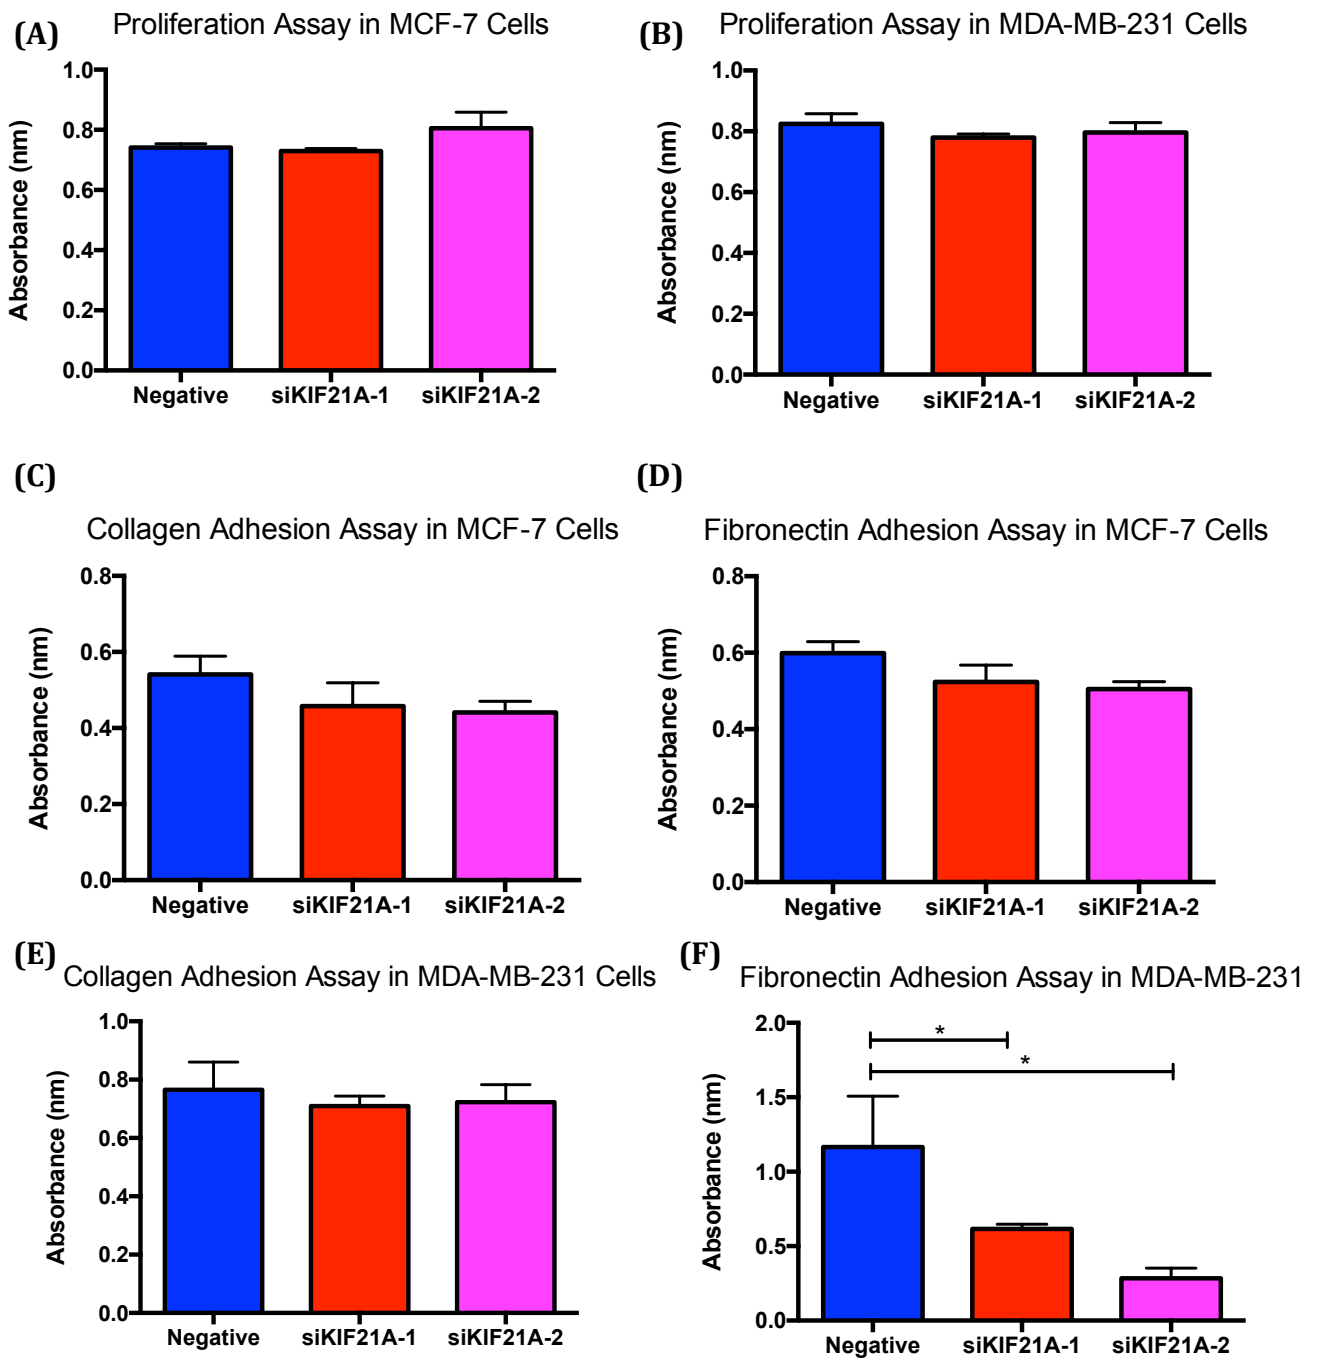



**Figure 5.**

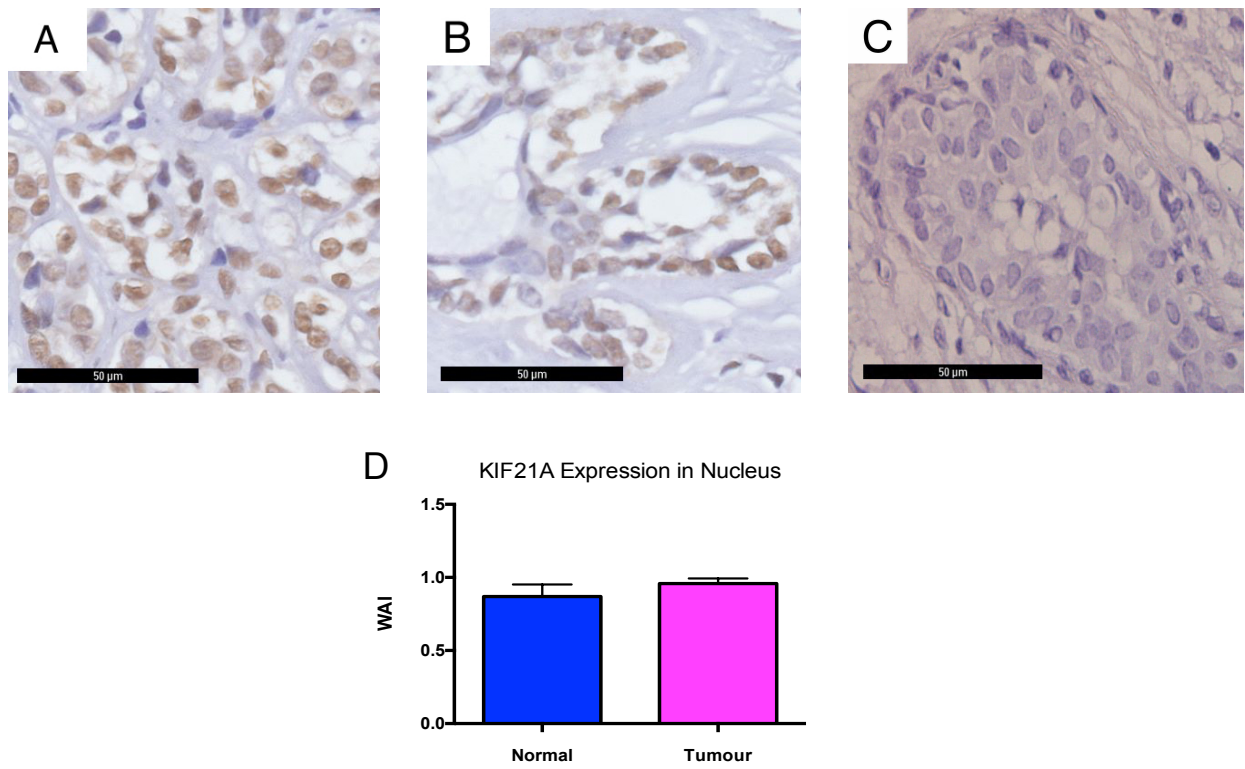

**Figure 6.**

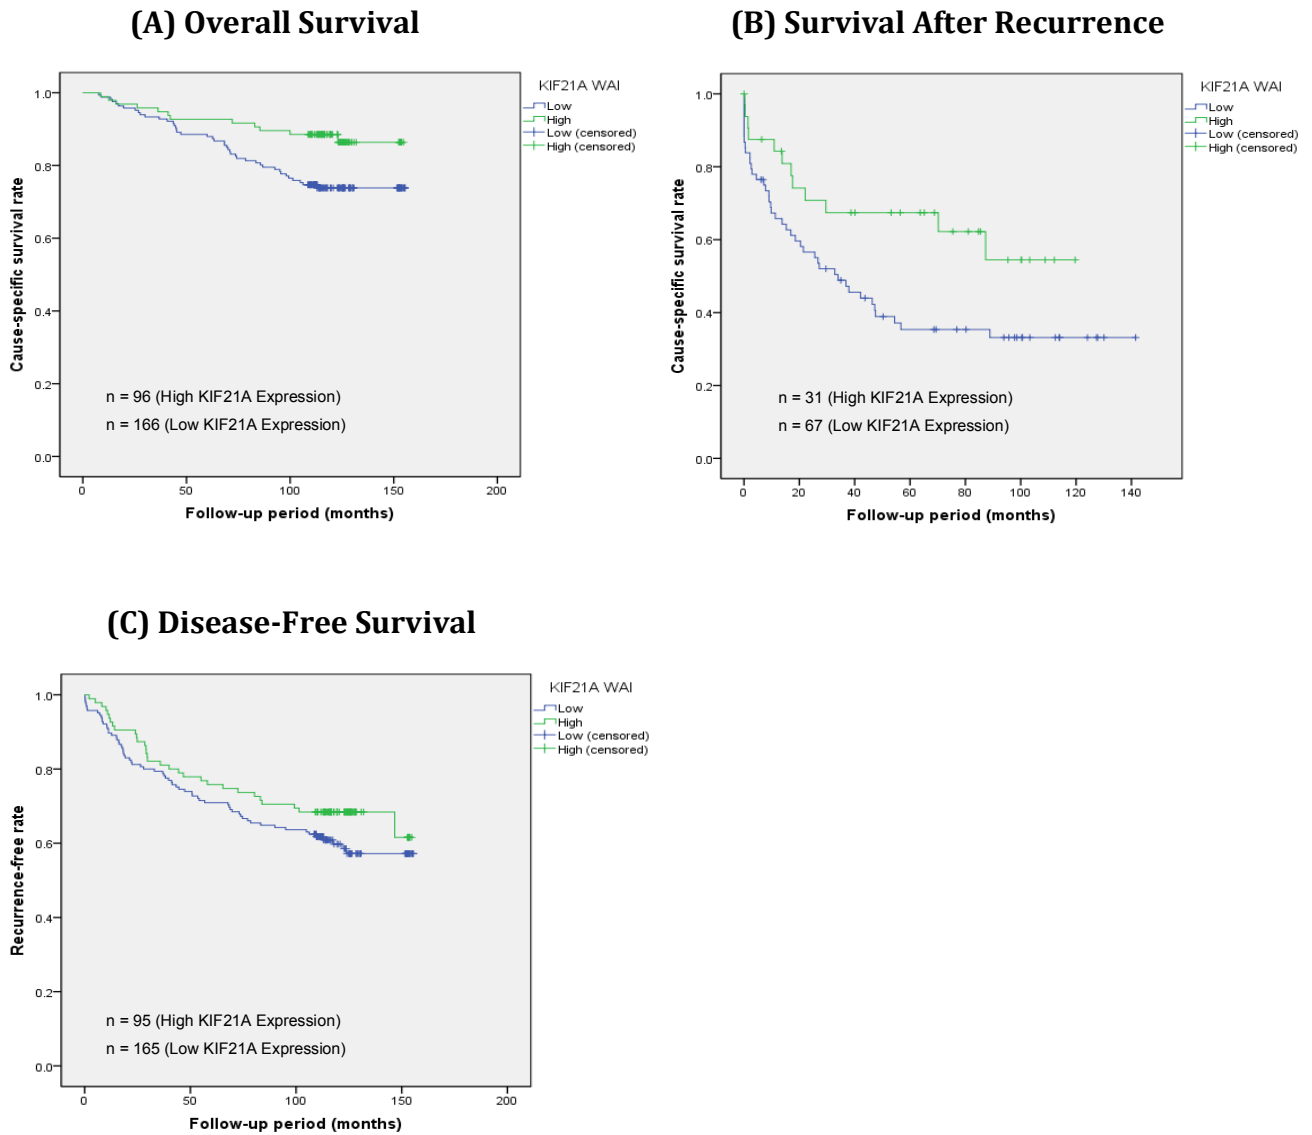

## REFERENCES

1. Ferlay J, Soerjomataram I, Ervik M, Dikshit R, Eser S, Mathers C, et al. GLOBOCAN 2012 v1.0, Cancer Incidence and Mortality Worldwide: IARC CancerBase No. 11 [Internet]. Lyon, France: International Agency for Research on Cancer; 2013. Available from: <http://globocan.iarc.fr>, accessed on 01/09/2015.
2. Liu X, Gong H, Huang K. Oncogenic role of kinesin proteins and targeting kinesin therapy. *Cancer Sci*. 2013 Jun;104(6):651-6.
3. Vale RD, Reese TS, Sheetz MP. Identification of a novel force-generating protein, kinesin, involved in microtubule-based motility. *Cell*. 1985 Aug;42(1):39-50.
4. Miki H, Setou M, Kaneshiro, Hirokawa. All kinesin superfamily protein, KIF, genes in mouse and human. *Proc Natl Acad Sci USA*. 2001 Jun 19;98(13):7004-11.
5. Lawrence CJ, Dawe RK, Christie KR, Cleveland DW, Dawson SC, Endow S, et al. A standardized kinesin nomenclature. *J Cell Biol*. 2004 Oct 11;167(1):19-22.
6. Diefenbach RJ, Mackay JP, Armati PJ, Cunningham AL. The C-terminal region of the stalk domain of ubiquitous human kinesin heavy chain contains the binding site for kinesin light chain. *Biochemistry*. 1998;37(1):16663-70.
7. Goldstein LS, Philp AV. The road less traveled: emerging principles of kinesin motor utilization. *Annu Rev Cell Dev Biol*. 1999;15(2): 141-83.
8. Castillo A, Morse HC, Godfrey VL, Naeem R, Justice MJ. Overexpression of Eg5 causes genomic instability and tumour formation in mice. *Cancer Res*. 2007;67(21):10138-47.
9. Wordeman L. How kinesin motor proteins drive mitotic spindle function: lessons from molecular assays. *Semin Cell Dev Biol* 2010;21(3):260-8.
10. Carleton M, Mao M, Biery M, Warrenner P, Kim S, Buser C, et al. RNA interference-mediated silencing of mitotic kinesin KIF14 disrupts cell cycle progression and induces cytokinesis failure. *Mol Cell Biol*. 2006 May;26(10):3853-63.

11. Molina I, Baars S, Brill JA, Hales KG, Fuller MT, Ripoll P. A chromatin-associated kinesin-related protein required for normal mitotic chromosome segregation in *Drosophila*. *J Cell Biol.* 1997 Dec 15;139(6):1361-71.
12. Oki E, Hisamatsu Y, Ando K, Saeki H, Kakeji Y, Maehara Y. Clinical aspect and molecular mechanism of DNA aneuploidy in gastric cancers. *J Gastroenterol* 2012;47(4):351–8.
13. Wu G, Zhou L, Khidr L, Guo XE, Kim W, Lee YM, et al. A novel role of the chromokinesin KIF4A in DNA damage response. *Cell Cycle.* 2008;7(13):2013-2020.
14. Mazumdar M, Lee JH, Sengupta K, Ried T, Rane S, Misteli T. Tumor formation via loss of a molecular motor protein. *Curr Biol.* 2006 Aug 8;16(15):1559-64.
15. Corson TW, Gallie BL. KIF14 mRNA expression is a predictor of grade and outcome in breast cancer. *Int J Cancer.* 2006 Sep 1;119(5):1088-94.
16. Sanhaji M, Friel CT, Wordeman L, Louwen F, Yuan J. Mitotic centromere-associated kinesin (MCAK): a potential cancer drug target. *Oncotarget.* 2011 Dec;2(12):935-47.
17. Nishidate T, Katagiri T, Lin ML, Mano Y, Miki Y, Kasumi F, et al. Genome-wide gene-expression profiles of breast-cancer cells purified with laser microbeam microdissection: identification of genes associated with progression and metastasis. *Int J Oncol.* 2004 Oct;25(4):797-819.
18. Shimo A, Tanikawa C, Nishidate T, Lin ML, Matsudi K, Park JH, et al. Involvement of kinesin family member 2C/mitotic centromere-associated kinesin overexpression in mammary carcinogenesis. *Cancer Sci.* 2008 Jan;99(1):62-70.
19. De S, Cipriano R, Jackson MW, Stark GR. Overexpression of kinesins mediates docetaxel resistance in breast cancer cells. *Cancer Res.* 2009 Oct;69(20):8035-42
20. Tan MH, De S, Bebek G, Orloff MS, Wesolowski R, Downs-Kelly E, et al. Specific kinesin expression profiles associated with taxane resistance in basal-like breast cancer. *Breast Cancer Res Treat.* 2012 Feb;131(3):849-58.

21. Ganguly A, Yang H, Cabral F. Overexpression of mitotic centromere-associated kinesin stimulates microtubule detachment and confers resistance to paclitaxel. *Mol Cancer Ther.* 2011 Jun;10(6):929-37.
22. Groth-Pedersen L, Aits S, Corcelle-Termeau E, Petersen NH, Nylandsted J, Jäättelä M. Identification of cytoskeleton-associated proteins essential for lysosomal stability and survival of human cancer cells. *PLoS One.* 2012;7(10):e45381.
23. Jimbo T, Kawasaki Y, Koyama R, Sato R, Takada S, Haraguchi K, et al. Identification of a link between the tumour suppressor APC and the kinesin superfamily. *Nat Cell Biol.* 2002 Apr;4(4):323-7.
24. Wang F, Lin SL. Knockdown of kinesin KIF11 abrogates directed migration in response to epidermal growth factor-mediated chemotaxis. *Biochem Biophys Res Commun.* 2014 Sep;452(3):642-8.
25. Ahmed SM, Theriault BL, Uppalapati M, Chiu CW, Gallie BL, Sidhu SS, et al. KIF14 negatively regulates Rap1a-Radil signaling during breast cancer progression. *J Cell Biol.* 2012 Dec 10;199(6):951-67.
26. Wang J, Ma S, Ma R, Qu X, Liu W, Ly C, et al. KIF2A silencing inhibits the proliferation and migration of breast cancer cells and correlates with unfavorable prognosis in breast cancer. *BMC Cancer.* 2014 Jun 21;14:461.
27. Zhang C, Zhu C, Chen H, Li L, Guo L, Jiang W, et al. Kif18A is involved in human breast carcinogenesis. *Carcinogenesis.* 2010 Sep;31(9):1676-84.
28. Yu Y, Wang XY, Sun L, Wang YL, Wan YF, Li XQ, et al. Inhibition of KIF22 suppresses cancer cell proliferation by delaying mitotic exit through upregulating CDC25C expression. *Carcinogenesis.* 2014 Jun;35(6):1416-25.
29. Li G, Luna C, Qiu J, Epstein DL, Gonzalez P. Targeting of Integrin  $\beta 1$  and Kinesin 2 $\alpha$  by MicroRNA 183. *J Biol Chem.* 2010 Feb 19; 285(8): 5461–5471.
30. Yoon JR, Whipple RA, Balzer EM, Cho EH, Matrone MA, Peckham M, et al. Local anesthetics inhibit kinesin motility and microtentacle protrusions in human epithelial and breast tumor cells. *Breast Cancer Res Treat.* 2011 Oct;129(3):691-701.

31. Wakefield LM, Roberts AB. TGF-beta signaling: positive and negative effects on tumorigenesis. *Curr Opin Genet Dev*. 2002 Feb;12(1):22-9.
32. Roberts AB, Wakefield LM. The two faces of transforming growth factor beta in carcinogenesis. *Proc Natl Acad Sci USA*. 2003 Jul 22;100(15):8621-3.
33. de la Iglesia N, Konopka G, Puram SV, Chan JA, Bachoo RM, You MJ, et al. Identification of a PTEN-regulated STAT3 brain tumor suppressor pathway. *Genes Dev*. 2008 Feb 15;22(4):449-62.
34. Hung PF, Hong TM, Hsu YC, Chen HY, Chang YL, Wu CT, et al. The motor protein KIF14 inhibits tumor growth and cancer metastasis in lung adenocarcinoma. *PLoS One*. 2013;8(4):e61664.
35. Shen X, Meza-Carmen V, Puxeddu E, Wang G, Moss J, Vaughan M. Interaction of brefeldin A-inhibited guanine nucleotide-exchange protein (BIG) 1 and kinesin motor protein KIF21A. *Proc Natl Acad Sci USA*. 2008 Dec 2; 105(48):18788-93.
36. Boal F, Stephens DJ. Specific functions of BIG1 and BIG2 in endomembrane organization. *PLoS One*. 2010 Mar 25; 5(3):e9898.
37. Kakinuma N, Kiyama R. A major mutation of KIF21A associated with congenital fibrosis of the extraocular muscles type 1 (CFEOM1) enhances translocation of Kank1 to the membrane. *Biochem Biophys Res Commun*. 2009 Sep 4; 386(4):639-44.
38. Li CC, Kuo JC, Waterman CM, Kiyama R, Moss J, Vaughan M. Effects of brefeldin A-inhibited guanine nucleotide-exchange (BIG) 1 and KANK1 proteins on cell polarity and directed migration during wound healing. *Proc Natl Acad Sci U S A*. 2011 Nov 29;108(48):19228-33.
39. Etienne-Manneville S. Cdc42--the centre of polarity. *J Cell Sci*. 2004 Mar 15;117(8):1291-300.
40. Etienne-Manneville S, Hall A. Cell polarity: Par6, aPKC and cytoskeletal crosstalk. *Curr Opin Cell Biol*. 2003 Feb;15(1):67-72.
41. Narod SA. Tumour size predicts long-term survival among women with lymph node-positive breast cancer. *Curr Oncol*. 2012 Oct; 19(5):249-253.

42. Zou JX, Duan Z, Wang J, Sokolov A, Xu J, Chen CZ, Li JJ, Chen HW. Kinesin family deregulation coordinated by bromodomain protein ANCCA and histone methyltransferase MLL for breast cancer cell growth, survival, and tamoxifen resistance. *Mol Cancer Res.* 2014 Apr;12(4):539-49.
43. Wang J, Ma S, Ma R, Qu X, Liu W, Ly C, et al. KIF2A silencing inhibits the proliferation and migration of breast cancer cells and correlates with unfavorable prognosis in breast cancer. *BMC Cancer.* 2014 Jun 21;14:461.
44. Wang C, Wang C, Wei Z, Li Y, Wang W, Li X, et al. Suppression of motor protein KIF3C expression inhibits tumor growth and metastasis in breast cancer by inhibiting TGF- $\beta$  signaling. *Cancer Lett.* 2015 Nov 1;368(1):105-14.
45. Wang Q, Zhao ZB, Wang G, Hui Z, Ming-Hua W, Jun-Feng P, et al. High expression of KIF26B in breast cancer associates with poor prognosis. *PLoS One.* 2013;8(4):e61640.
46. Gao J, Sai N, Wang C, Sheng X, Shao Q, Zhou C, et al. Overexpression of chromokinesin KIF4 inhibits proliferation of human gastric carcinoma cells both in vitro and in vivo. *Tumour Biol.* 2011 Feb;32(1):53-61.
47. Massague J. G1 cell cycle control and cancer. *Nature.* 2004;432:298–306.
48. Bakhom SF, Compton DA. Chromosomal instability and cancer: a complex relationship with therapeutic potential. *J Clin Invest.* 2012 Apr;122(4):1138-43.
49. Chan JY. A clinical overview of centrosome amplification in human cancers. *Int J Biol Sci.* 2011;7(8):1122-44.
50. McGranahan N, Burrell RA, Endesfelder D, Novelli MR, Swanton C. Cancer chromosomal instability: therapeutic and diagnostic challenges. *EMBO Rep.* 2012 Jun 1;13(6):528-38.
51. Pfau SJ, Amon A. Chromosomal instability and aneuploidy in cancer: from yeast to man. *EMBO Rep.* 2012 Jun 1;13(6):515-27.
